# Supplementary material for: Effect of Terahertz Electromagnetic Field on the Permeability of Potassium Channel Kv1.2
Source: MDPI journal article supplement (doi:10.3390/ijms241210271), 2023-06-17
Supplement: s1 [file s1]

# Supplement Data

## Effect of terahertz electromagnetic field on the permeability of potassium channel Kv1.2

Wen Ding <sup>1,2,†</sup>, Xiaofei Zhao <sup>1,2,†</sup>, Hongguang Wang <sup>1,2</sup>, Yize Wang <sup>1,2</sup>, Yanjiang Liu <sup>1,2</sup>, Lirong Gong <sup>1,2</sup>, Shu Lin <sup>1,2</sup>, Chunliang Liu <sup>1,2,\*</sup> and Yongdong Li <sup>1,2,\*</sup>

- <sup>1</sup> Key Laboratory for Physical Electronics and Devices of the Ministry of Education, Xi'an Jiaotong University, Xi'an 710049, China;  
dingwen@mail.xjtu.edu.cn (W.D.); zhaoxiaofei@stu.xjtu.edu.cn (X.Z.);  
wanghg@mail.xjtu.edu.cn (H.W.); wangyize@stu.xjtu.edu.cn (Y.W.);  
yanjiang@stu.xjtu.edu.cn (Y.L.); gonglr@stu.xjtu.edu.cn (L.G.);  
shulin@mail.xjtu.edu.cn (S.L.)
- <sup>2</sup> School of Electronic Science and Engineering, Xi'an Jiaotong University, Xi'an 710049, China
- \* Correspondence: chlilu@mail.xjtu.edu.cn (C.L.); leyond@mail.xjtu.edu.cn (Y.L.);  
Tel.: +86-15929942829 (C.L.); +86-029-82668657 (Y.L.)
- † These authors contributed equally to this work.

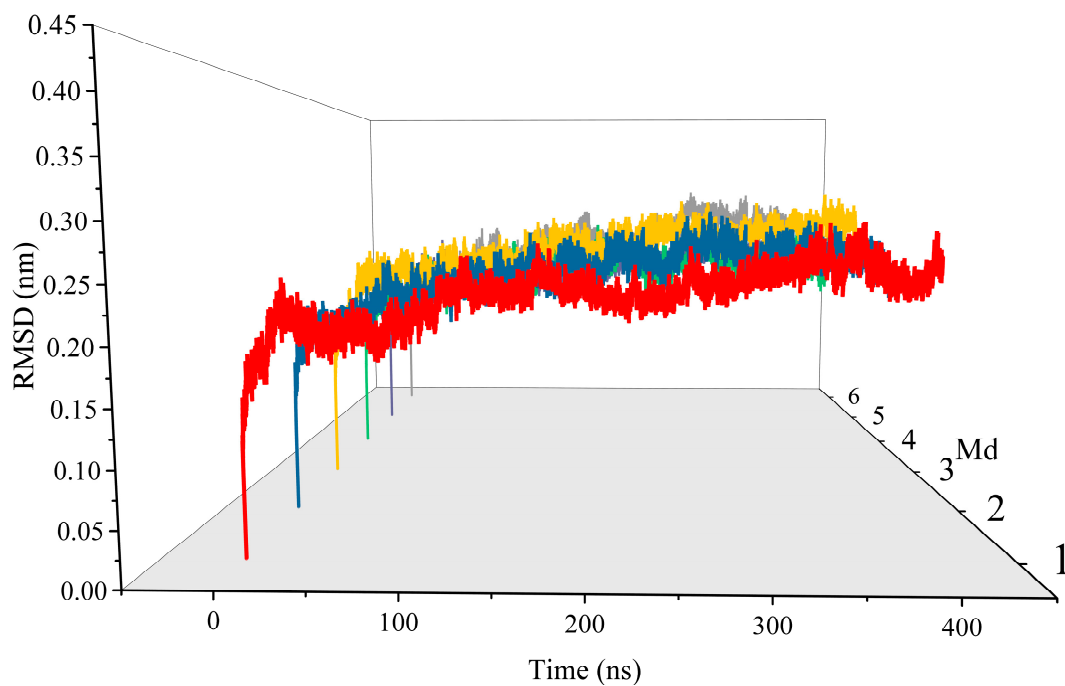

Figure S1: Root Mean Square Deviation (RMSD) of the channel without an applied electric field.

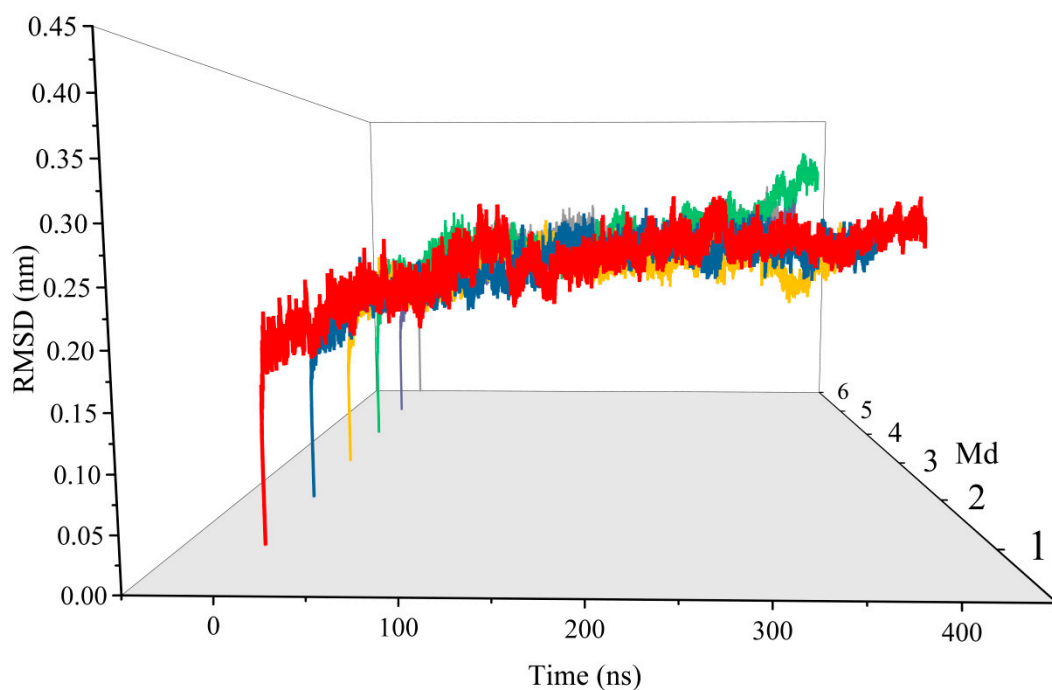

Figure S2: Root Mean Square Deviation (RMSD) of the channel with an applied electric field of 4THz.

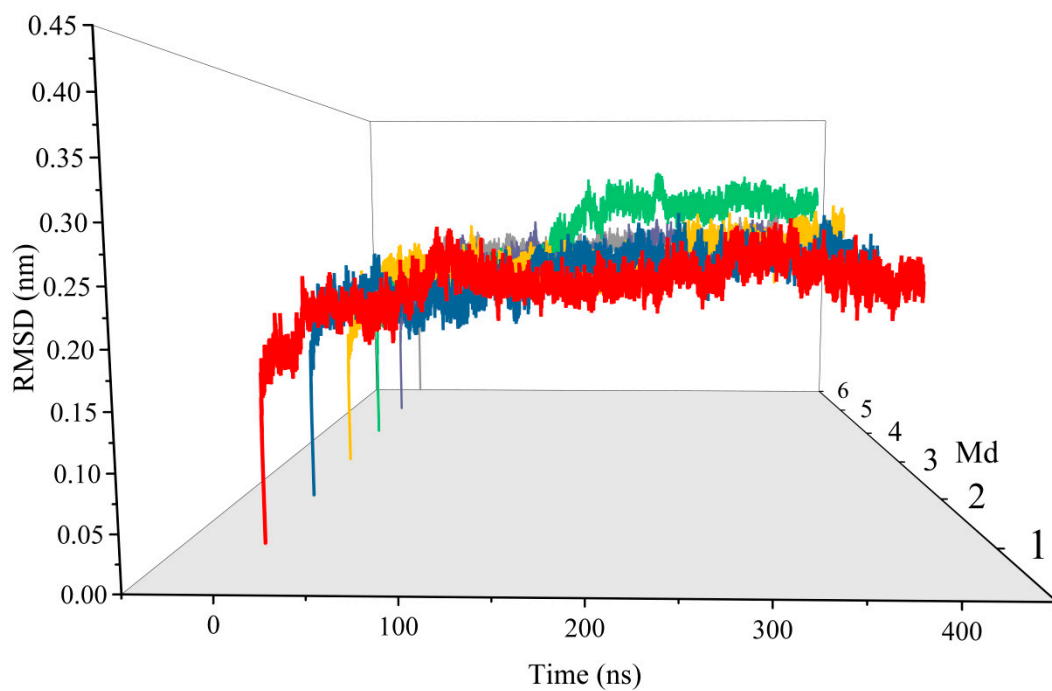

Figure S3: Root Mean Square Deviation (RMSD) of the channel with an applied electric field of 10THz.

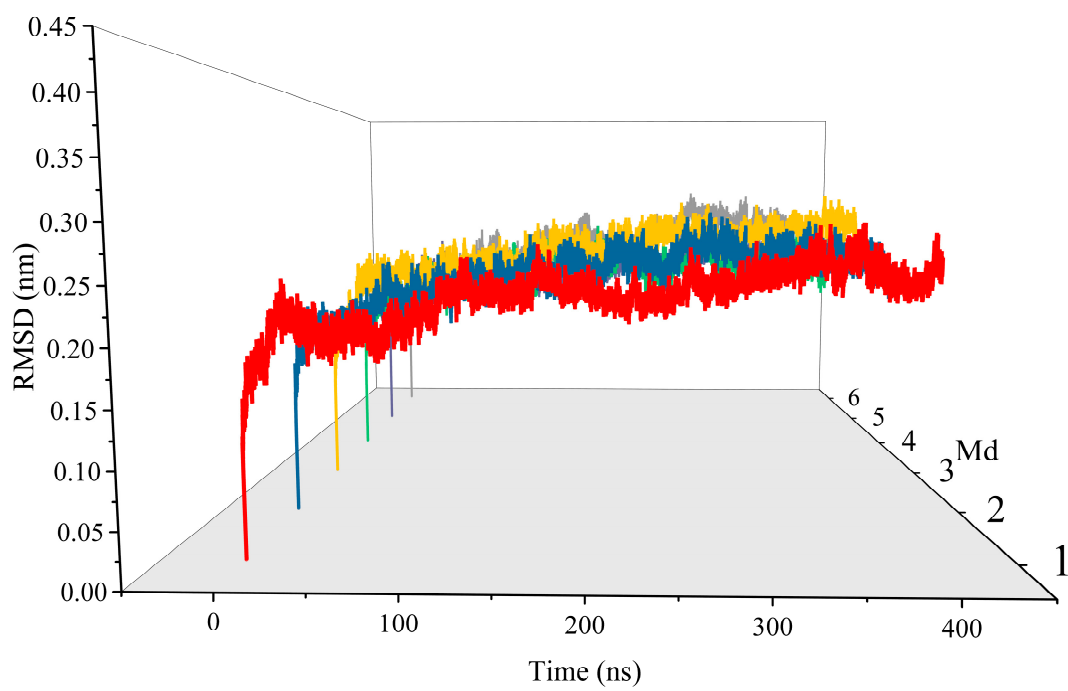

Figure S4: Root Mean Square Deviation (RMSD) of the channel with an applied electric field of 15THz.

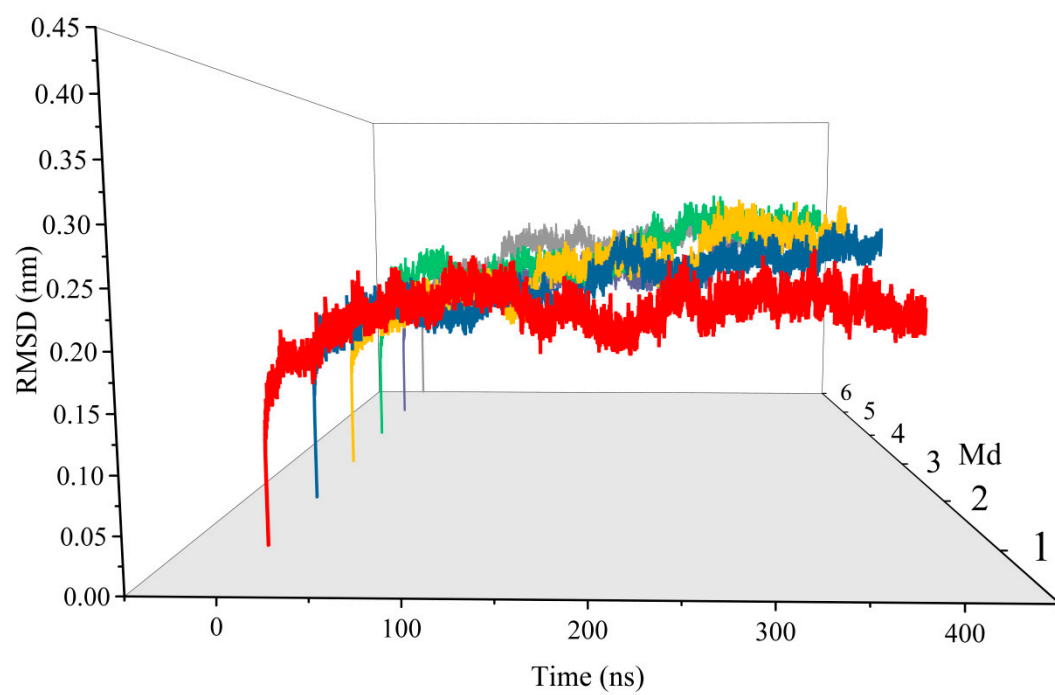

Figure S5: Root Mean Square Deviation (RMSD) of the channel with an applied electric field of 20THz.
